# Supplementary material for: S. aureus Colonization, Biofilm Production, and Phage Susceptibility in Peritoneal Dialysis Patients
Source: PubMed Central journal article supplement (PMC7558627; doi:10.3390/antibiotics9090582), 2020-09-07
Supplement: antibiotics-09-00582-s001.pdf [file antibiotics-09-00582-s001.pdf]

**Table S1.** Patients characteristics. Note: PD, peritoneal dialysis; ADPKD, autosomal dominant polycystic kidney disease; COPD, chronic obstructive pulmonary disease.

| N  | Age | Sex | Cause of end-stage renal disease | Outcome in two years                                                                                              | Co-morbidities                  |
|----|-----|-----|----------------------------------|-------------------------------------------------------------------------------------------------------------------|---------------------------------|
| 1  | 55  | ♂   | Diabetic nephropathy             | 1 episode of <i>S. aureus</i> / <i>Pseudomonas spp.</i> peritonitis, transplantation                              | Diabetes                        |
| 2  | 36  | ♂   | Glomerulonephritis               | Transplantation                                                                                                   |                                 |
| 3  | 74  | ♀   | Glomerulonephritis               | Death                                                                                                             | Diabetes, Chronic heart failure |
| 4  | 33  | ♀   | Glomerulonephritis               | Transplantation                                                                                                   |                                 |
| 5  | 75  | ♂   | Chronic interstitial nephritis   | 1 episode of methicillin-sensitive <i>S. aureus</i> peritonitis                                                   |                                 |
| 6  | 76  | ♂   | Hypertensive nephropathy         | 3 episodes of peritonitis (2 <i>Streptococcus spp.</i> , 1 culture negative)                                      | Chronic heart failure           |
| 7  | 61  | ♂   | Chronic interstitial nephritis   | 1 episode of <i>Enterococcus spp.</i> peritonitis                                                                 |                                 |
| 8  | 83  | ♂   | Chronic interstitial nephritis   | Death                                                                                                             | Chronic heart failure, Gout     |
| 9  | 78  | ♀   | Chronic interstitial nephritis   | 1 episode of <i>Streptococcus spp.</i> peritonitis, death                                                         |                                 |
| 10 | 67  | ♀   | Hypertensive nephropathy         | Transplantation                                                                                                   | Chronic heart failure           |
| 11 | 56  | ♂   | Chronic interstitial nephritis   | Uneventful PD                                                                                                     |                                 |
| 12 | 68  | ♀   | Diabetic nephropathy             | Death                                                                                                             | Diabetes                        |
| 13 | 71  | ♀   | Hypertensive nephropathy         | Uneventful PD                                                                                                     | Chronic heart failure, COPD     |
| 14 | 36  | ♂   | Chronic interstitial nephritis   | Transplantation                                                                                                   | Viral hepatitis                 |
| 15 | 64  | ♂   | Chronic interstitial nephritis   | Uneventful PD                                                                                                     | Chronic heart failure           |
| 16 | 69  | ♀   | Diabetic nephropathy             | 1 episode of <i>culture negative</i> peritonitis, removal of PD catheter                                          | Diabetes                        |
| 17 | 42  | ♀   | Chronic interstitial nephritis   | Transplantation                                                                                                   |                                 |
| 18 | 58  | ♀   | ADPKD                            | 2 episodes of peritonitis (1 <i>Aeromonas spp.</i> , 1 <i>Streptococcus spp.</i> )                                | Viral hepatitis                 |
| 19 | 60  | ♂   | ADPKD                            | Transplantation                                                                                                   |                                 |
| 20 | 32  | ♂   | Glomerulonephritis               | Uneventful PD                                                                                                     |                                 |
| 21 | 60  | ♀   | ADPKD                            | Uneventful PD                                                                                                     |                                 |
| 22 | 59  | ♂   | Glomerulonephritis               | 1 episode of coagulase-negative <i>Staphylococcus spp.</i> peritonitis                                            | Chronic heart failure           |
| 23 | 44  | ♂   | Glomerulonephritis               | Transplantation                                                                                                   | Chronic heart failure           |
| 24 | 64  | ♀   | Unknown                          | 2 episodes of peritonitis (1 <i>Streptococcus spp.</i> , 1 culture negative), removal of PD catheter              | Chronic heart failure           |
| 25 | 34  | ♂   | Glomerulonephritis               | Transplantation                                                                                                   |                                 |
| 26 | 77  | ♀   | ADPKD                            | Death                                                                                                             |                                 |
| 27 | 68  | ♂   | Glomerulonephritis               | Uneventful PD                                                                                                     | Chronic heart failure, COPD     |
| 28 | 64  | ♂   | Glomerulonephritis               | 2 episodes of peritonitis (1 methicillin-sensitive <i>S. aureus</i> , 1 culture negative), removal of PD catheter |                                 |
| 29 | 43  | ♀   | Glomerulonephritis               | Removal of PD catheter                                                                                            |                                 |
| 30 | 39  | ♀   | Chronic interstitial nephritis   | 1 episode of <i>Streptococcus spp.</i> peritonitis                                                                |                                 |

|    |    |   |                                |                                                                                                                                                               |                                              |
|----|----|---|--------------------------------|---------------------------------------------------------------------------------------------------------------------------------------------------------------|----------------------------------------------|
| 31 | 52 | ♂ | Diabetic nephropathy           | Uneventful PD                                                                                                                                                 | Diabetes, Chronic heart failure, COPD        |
| 32 | 79 | ♀ | Diabetic nephropathy           | Uneventful PD                                                                                                                                                 | Diabetes                                     |
| 33 | 58 | ♀ | Glomerulonephritis             | Death                                                                                                                                                         |                                              |
| 34 | 76 | ♂ | Chronic interstitial nephritis | 1 episode of culture negative peritonitis, removal of PD catheter                                                                                             |                                              |
| 35 | 69 | ♂ | Glomerulonephritis             | 1 episode of culture negative peritonitis                                                                                                                     |                                              |
| 36 | 68 | ♂ | Diabetic nephropathy           | Transplantation                                                                                                                                               | Diabetes                                     |
| 37 | 82 | ♂ | Glomerulonephritis             | Uneventful PD                                                                                                                                                 | Gout, Viral hepatitis COPD                   |
| 38 | 41 | ♀ | Diabetic nephropathy           | Death                                                                                                                                                         | Diabetes, Viral hepatitis                    |
| 39 | 65 | ♂ | Glomerulonephritis             | 3 episodes of peritonitis (1 methicillin-resistant coagulase-negative <i>Staphylococcus</i> , 1 <i>Aerococcus spp./Pseudomonas spp.</i> , 1 culture negative) |                                              |
| 40 | 31 | ♀ | Glomerulonephritis             | Uneventful PD                                                                                                                                                 |                                              |
| 41 | 68 | ♀ | ADPKD                          | Removal of PD catheter                                                                                                                                        |                                              |
| 42 | 53 | ♂ | Glomerulonephritis             | Uneventful PD                                                                                                                                                 |                                              |
| 43 | 81 | ♀ | Glomerulonephritis             | 1 episode of <i>Bacillus spp.</i> peritonitis                                                                                                                 | Chronic heart failure, Gout                  |
| 44 | 71 | ♂ | Glomerulonephritis             | 3 episodes of <i>Streptococcus spp.</i> peritonitis                                                                                                           | Chronic heart failure                        |
| 45 | 72 | ♀ | Hypertensive nephropathy       | Death                                                                                                                                                         |                                              |
| 46 | 32 | ♀ | Diabetic nephropathy           | Death                                                                                                                                                         | Diabetes, Gout                               |
| 47 | 69 | ♂ | Glomerulonephritis             | Uneventful PD                                                                                                                                                 | Chronic heart failure, COPD, Viral hepatitis |
| 48 | 58 | ♂ | Hypertensive nephropathy       | Death                                                                                                                                                         |                                              |
| 49 | 60 | ♀ | Glomerulonephritis             | Removal of PD catheter                                                                                                                                        |                                              |
| 50 | 61 | ♀ | ADPKD                          | Transplantation                                                                                                                                               |                                              |
| 51 | 58 | ♂ | Glomerulonephritis             | Transplantation                                                                                                                                               |                                              |
| 52 | 36 | ♀ | Chronic interstitial nephritis | 1 episode of <i>Candida spp.</i> peritonitis                                                                                                                  | Chronic heart failure                        |
| 53 | 87 | ♀ | Hypertensive nephropathy       | 2 episodes of <i>Streptococcus spp.</i> peritonitis                                                                                                           |                                              |
| 54 | 45 | ♀ | Glomerulonephritis             | Uneventful PD                                                                                                                                                 | Chronic heart failure, COPD                  |
| 55 | 72 | ♂ | Chronic interstitial nephritis | Removal of PD catheter                                                                                                                                        | Chronic heart failure                        |
| 56 | 77 | ♀ | Glomerulonephritis             | Uneventful PD                                                                                                                                                 |                                              |
| 57 | 69 | ♂ | Hypertensive nephropathy       | Death                                                                                                                                                         |                                              |
| 58 | 65 | ♂ | Diabetic nephropathy           | Death                                                                                                                                                         | Diabetes, Chronic heart failure, Gout        |
| 59 | 81 | ♂ | Chronic interstitial nephritis | Death                                                                                                                                                         |                                              |
| 60 | 57 | ♂ | ADPKD                          | Transplantation                                                                                                                                               |                                              |
| 61 | 65 | ♂ | Glomerulonephritis             | Transplantation                                                                                                                                               |                                              |
| 62 | 70 | ♂ | Glomerulonephritis             | Uneventful PD                                                                                                                                                 |                                              |
| 63 | 79 | ♀ | Hypertensive nephropathy       | 1 episode of culture negative peritonitis, death                                                                                                              |                                              |



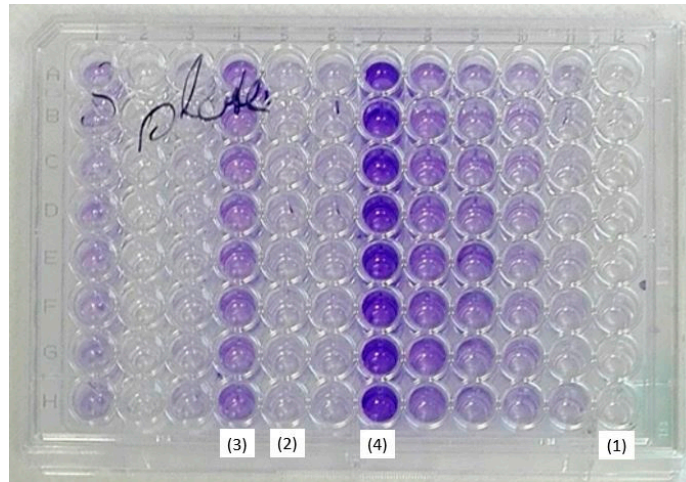

**Figure S1.** *S. aureus* biofilm growth using microtiter plate assay stained with crystal violet. (1) negative control no biofilm production, (2) weak biofilm producer, (3) moderate biofilm producer, (4) strong biofilm producer.
